# Supplementary material
Source: PubMed Central journal article supplement (PMC3743458)
Supplement: supp_12-11454_IOVS-12-11454-s01.pdf [file supp_12-11454_IOVS-12-11454-s01.pdf]

## Supplemental Figure Legends

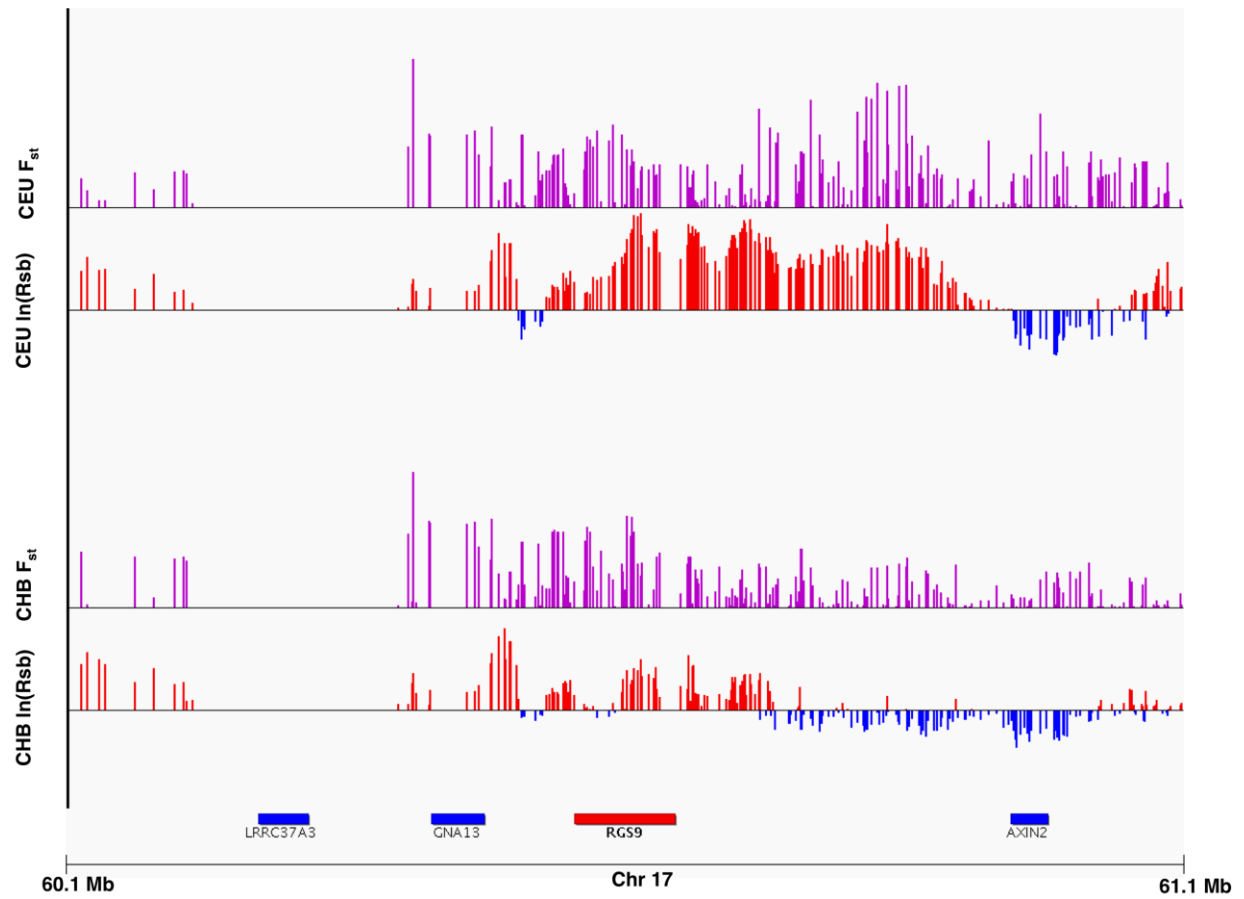

Figure S1: The SNP-level selection metrics and genes in the 1Mb region surrounding *RGS9*.

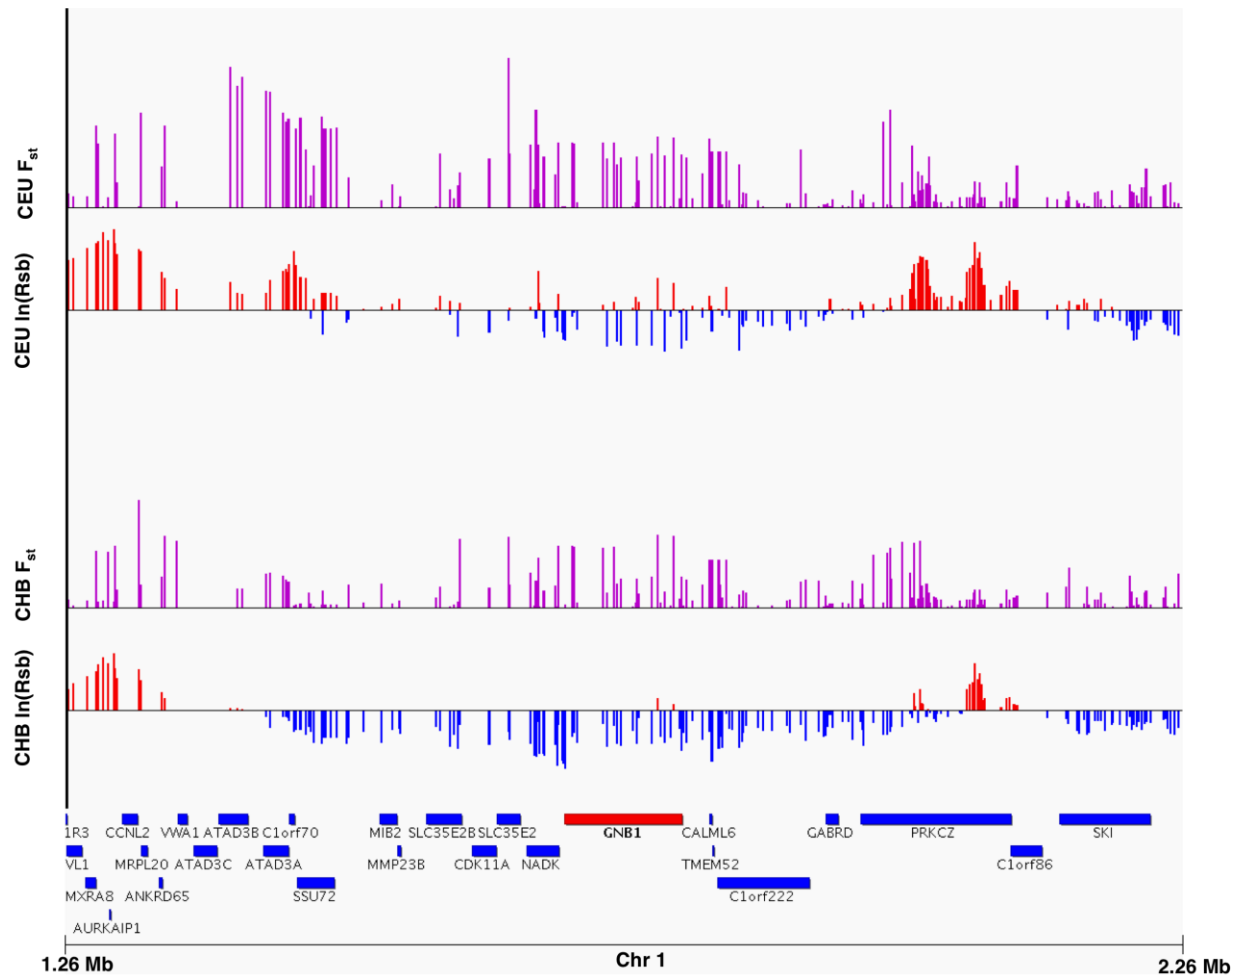

Figure S2: The SNP-level selection metrics and genes in the 1Mb region surrounding *GNB1*.

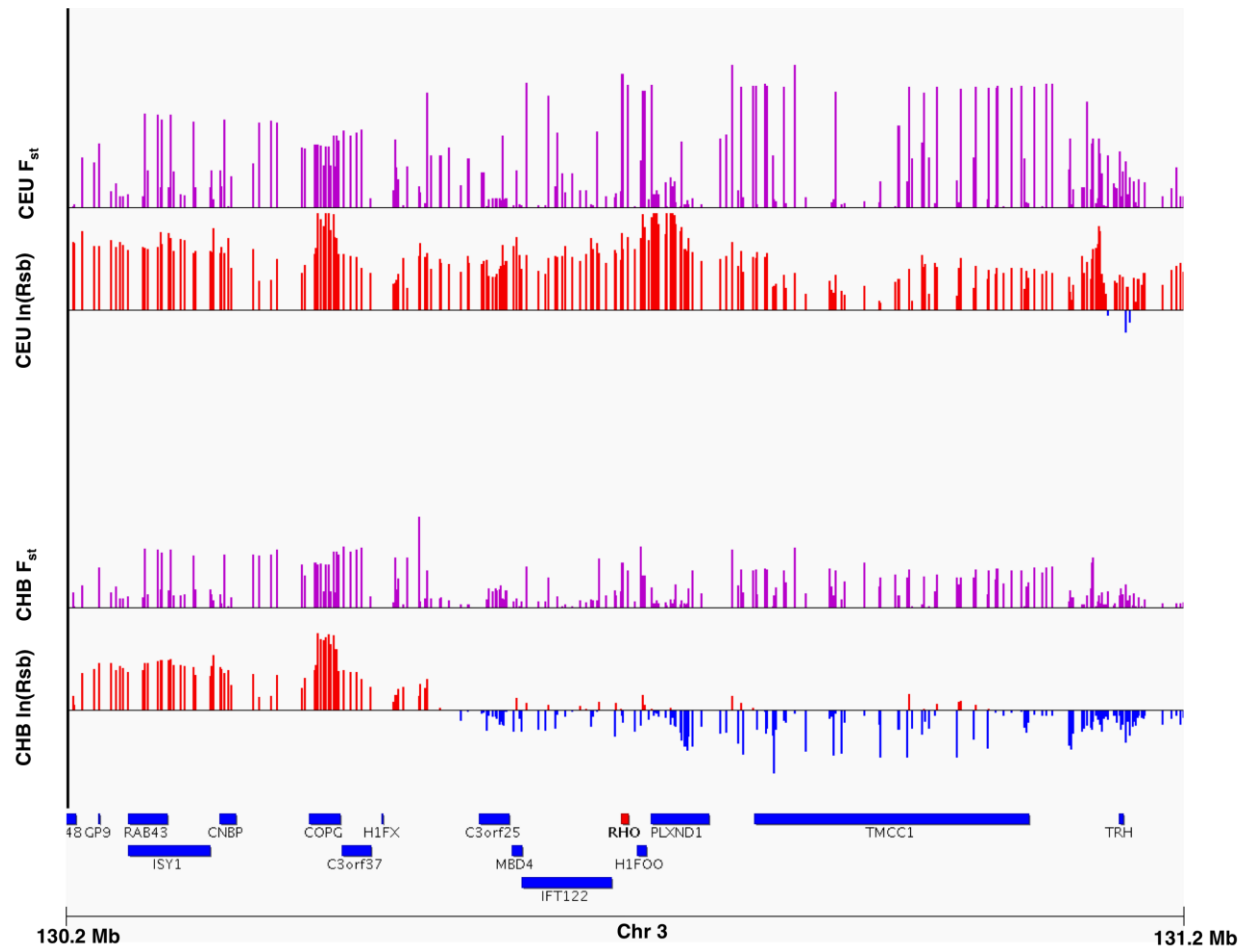

Figure S3: The SNP-level selection metrics and genes in the 1Mb region surrounding *RHO*.

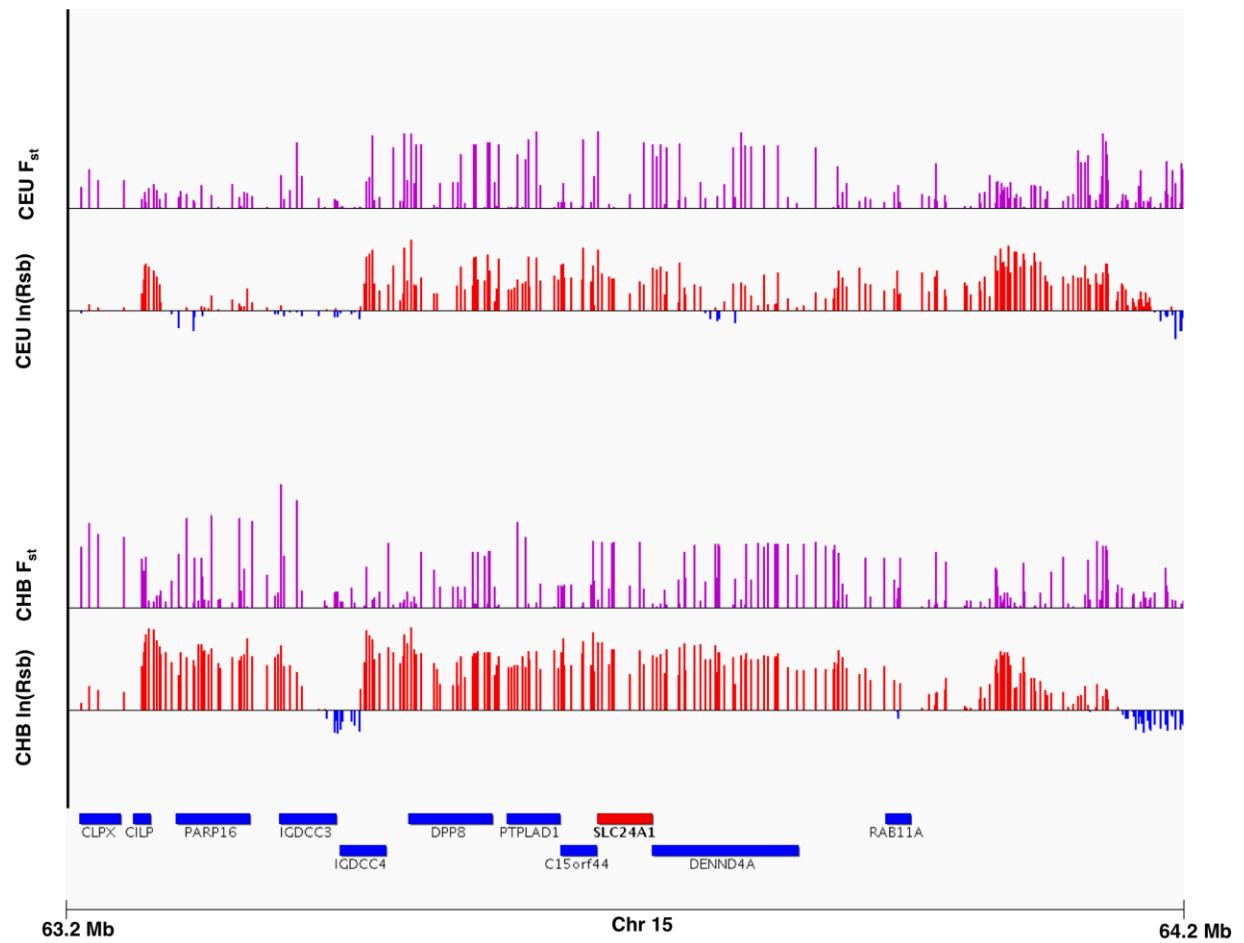

Figure S4: The SNP-level selection metrics and genes in the 1Mb region surrounding *SLC24A1*.

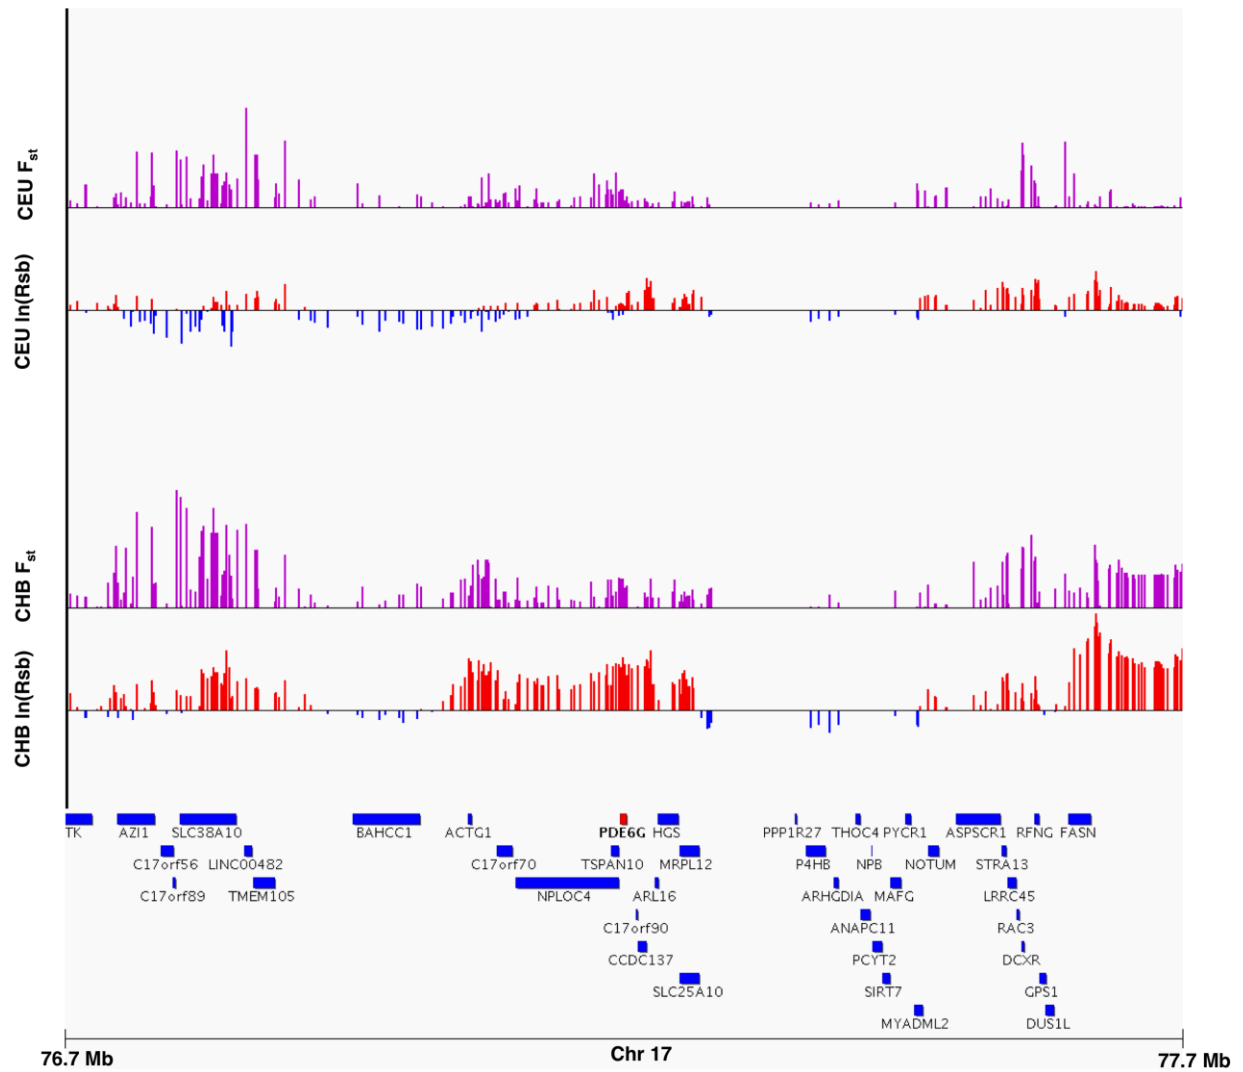

Figure S5: The SNP-level selection metrics and genes in the 1Mb region surrounding *PDE6G*.

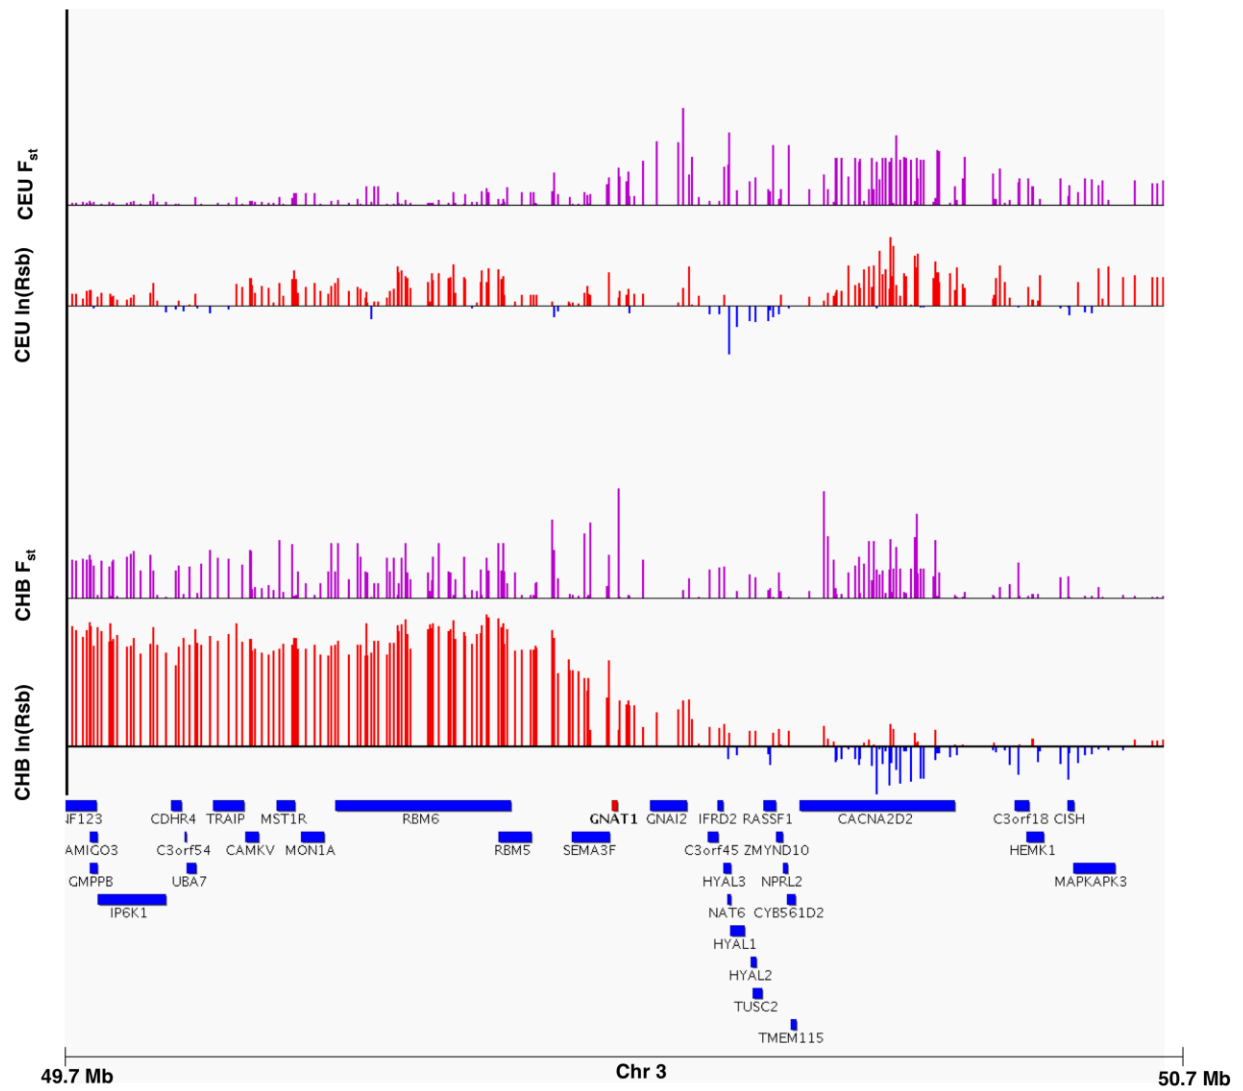

Figure S6: The SNP-level selection metrics and genes in the 1Mb region surrounding *GNAT1*.
